# Supplementary material
Source: ML conference proceedings conference paper supplement (https://proceedings.neurips.cc/paper_files/paper/2018/hash/aff0a6a4521232970b2c1cf539ad0a19-Abstract.html)
Supplement: Supplementary file [file aff0a6a4521232970b2c1cf539ad0a19-Supplemental.zip]

- [44] A. Terenin and E. P. Xing. Techniques for proving asynchronous convergence results for markov chain monte carlo methods. In *NIPS*, 2017.
- [45] P. O. S. Vaz de Melo, C. Faloutsos, R. Assunção, R. Alves, and A. A. Loureiro. Universal and distinct properties of communication dynamics: how to generate realistic inter-event times. *ACM Transactions on Knowledge Discovery from Data (TKDD)*, 9(3), 2015.
- [46] P. O. S. Vaz de Melo, C. Faloutsos, R. Assunção, and A. Loureiro. The self-feeding process: A unifying model for communication dynamics in the web. In *WWW*, 2013.
- [47] H. Wold. On stationary point processes and markov chains. *Scandinavian Actuarial Journal*, 1948(1-2), 1948.
- [48] H. Xu, M. Farajtabar, and H. Zha. Learning granger causality for hawkes processes. In *ICML*, 2016.
- [49] Y. Yang, J. Etesami, N. He, and N. Kiyavash. Online learning for multivariate hawkes processes. In *NIPS*, 2017.
- [50] H. Yin, A. R. Benson, J. Leskovec, and D. F. Gleich. Local higher-order graph clustering. In *KDD*, 2017.
- [51] H.-F. Yu, C.-J. Hsieh, H. Yun, S. Vishwanathan, and I. S. Dhillon. A scalable asynchronous distributed algorithm for topic modeling. In *WWW*, 2015.
- [52] J. Yuan, F. Gao, Q. Ho, W. Dai, J. Wei, X. Zheng, E. P. Xing, T.-Y. Liu, and W.-Y. Ma. Lightlda: Big topic models on modest computer clusters. In *WWW*, 2015.
- [53] K. Zhou, H. Zha, and L. Song. Learning social infectivity in sparse low-rank networks using multi-dimensional hawkes processes. In *AISTATS*, 2013.

## A Simulating GRANGER-BUSCA

In Algorithm 1 we show how Ogata’s Modified Thinning algorithm [38] is adapted for GRANGER-BUSCA. We initially point out that some care has to be taken for the initial simulated timestamps. Given that  $t_{a_i}$  (the previous observation) does not exist, the algorithm will need to either start with a synthetic initial increment or fall back to the Poisson rate. In the algorithm, the rate of each individual process is computed. Then, a new observation is generated based on the sum of such rates. Given that each process will behave like a Poisson process while a new event does not surface (Figure 1), the sum of these processes is also a Poisson process. Lastly, we employ a multinomial sampling to determine the process from which the observation belongs to.

## B Log Likelihood

We now derive the log likelihood of GRANGER-BUSCA for parameters  $\Theta = \{\mathbf{G}, \beta, \mu\}$ . For a point process with intensity  $\lambda(t)$ , the likelihood can be computed as [14]:

$$L(\Theta) = \prod_{i=1}^N \lambda(t_i) \exp\left(-\int_0^t \lambda(t) dt\right). \quad (7)$$

Considering the intensity of each process separately, we can write the log likelihood as:

$$\begin{aligned} LL_a(\Theta) &= \sum_{t_{a_i} \in \mathcal{P}_a} \left( \log(\lambda_a(t_{a_i})) \right) - \int_0^{t_a} \lambda_a(t) dt \\ &= \sum_{t_{a_i} \in \mathcal{P}_a} \left( \log(\mu_a + \sum_{b=0}^{K-1} \frac{\alpha_{ba}}{\beta_b + \Delta_{ba}(t_{a_i})}) \right) - T_a \mu_a - \sum_{t_{a_i} \in \mathcal{P}} \sum_{b=0}^{K-1} \frac{\alpha_{ba}(t_{a_i} - t_{a_{i-1}})}{\beta_b + \Delta_{ba}(t_{a_{i-1}})} \end{aligned} \quad (8)$$

Here,  $T_a$  is the last event from  $\mathcal{P}_a$ . The expansion of the integral  $\int_0^{T_a} \lambda_a(t) dt$  comes from the stepwise nature of  $\lambda_a(t)$  (see Figure 1). For simplicity, let us initially assume that there is only one process. As discussed in the paper, computing  $\Delta_{ba}(t)$  has a  $\log(N)$  cost. Due to summations of the form,  $\sum_{t_i \in \mathcal{P}} \sum_{b=0}^{K-1}$ , the cost to evaluate  $LL_a(\Theta)$  is  $O(K N \log(N))$ .  $N \log(N)$  is the cost to evaluate  $\Delta_{ba}(t)$  for every observation.

---

**Algorithm 1** Ogata’s Thinning Algorithm Adapted for GRANGER-BUSCA

---

**Input:** max time  $T$ , num proc  $K$ ,  $\mathbf{G}$ ,  $\beta$ ,  $\mu$   
**Output:** observations  $\mathcal{P}$   
 $t \leftarrow 0$   
 $\mathcal{P} = \{\}$   
 $\boldsymbol{\lambda} = \text{zeros}(K)$   
 $\mathbf{n} = \text{zeros}(K)$   
**while**  $t < T$  **do**  
    {Compute the rate for each process using  $\mathbf{G}$ ,  $\beta$ ,  $\mu$ . The rate  $\lambda_a(t)$  depends of  $t_{a_p}$  and  $t_{b_q}$  to compute  $\Delta_{ba}(t)$  (see Eq (3)). If such timestamps do not exist, fall back to a Poisson process, that is:  $\lambda_a(t) = \mu_a$ }  
    **for**  $a \leftarrow 0$  **to**  $K - 1$  **do**  
         $\lambda[a] \leftarrow \lambda_a(t)$   
    **end for**  
    {Move forward in time. That is, sample a new observation with rate  $\text{sum}(\boldsymbol{\lambda})$ }  
    Sample  $dt \sim \text{Exponential}(\lambda = \text{sum}(\boldsymbol{\lambda}))$   
     $t \leftarrow t + dt$   
    {Sample a process  $a$  to such that  $t_{a_i} = t$ }  
    Sample  $u \sim \text{Uniform}(0, \text{sum}(\boldsymbol{\lambda}))$   
     $a \leftarrow 0$   
     $c \leftarrow 0$   
    **while**  $a < K - 1$  **do**  
         $c \leftarrow c + \lambda[a]$   
        **if**  $c \geq \lambda[a]$  **then**  
            **break**  
        **end if**  
         $a \leftarrow a + 1$   
    **end while**  
     $i \leftarrow \mathbf{n}[a]$   
     $t_{a_i} \leftarrow t$   
     $\mathcal{P} \leftarrow \mathcal{P} \cup \{t_{a_i}\}$   
     $\mathbf{n}[a] \leftarrow \mathbf{n}[a] + 1$   
**end while**

---

Now, let us return to the case of multiple processes. Let  $N_a$  be the number of events for process  $a$ . Next,  $M$  is the number of events in the processes with the most of such a number. That is,  $M = \max(N_a \mid \forall a)$ . The cost of  $LL(\boldsymbol{\Theta})$ , naively, will be of  $O(K N \log(M))$ . This comes from the summation:  $\sum_{a=0}^{K-1} LL_a(\boldsymbol{\Theta}) = K \log(M) \sum_{a=0}^{K-1} N_a$ . To simplify the comparison with past methods, in our manuscript we did not detail our runtime cost in terms of  $M$ . Strictly speaking, our fitting algorithm with the MCMC sampler performs at a cost of:  $O(N (\log(M) + \log(K)))$ .

## C Fitting Algorithm

The algorithm is shown in Algorithm 2, with the E-step being detailed in Algorithm 3. The maximization step, for GRANGER-BUSCA in particular, is a MLE estimation for a Poisson process. The pseudo-code shown here is not parallel and builds the F+Tree naively. By updating  $n_b$  using a sloppy counter (see Chapter 11 of [3]) across processing cores, one only needs to iterate over  $\mathcal{P}_a$  to compute  $n_{ba}$ . The counter consists of a local count of  $n_b$  for each processor. After a certain number of steps, say at every  $x$ -iterations,  $n_b$  is synced with a master parameter server.

The runtime of the algorithm may be optimized by either pre-computing or caching  $\Delta_{ba}(t_{a_i})$  for every observation from every process. Nevertheless, this pre-computation comes at a memory cost of  $O(N K)$  being likely is prohibitive for larger datasets. We can however cache a small subset of such values to amortize the  $O(\log(N))$  cost down to  $O(1)$  for cache hits. Secondly, the  $O(\log(K))$  cost can also be amortized with an AliasTable. With these two optimizations, it is possible to implement optimized versions of the sampling algorithm that execute at a  $O(N)$  amortized cost per iteration.

---

**Algorithm 2** Sampling GRANGER-BUSCA

---

**Input:** all observations  $\mathcal{P}$ , prior  $\alpha_p$ , num. iter  $I$

**Output:**  $G, \mu$

$K \leftarrow |\mathcal{P}|$

$\mathcal{Z} \leftarrow \{\}$

$\mu \leftarrow \text{Zeros}(K)$

{Sample initial state from a random uniform  $\in [0, K]$ . The value  $K$  is reserved to indicate exogeneous events.  $\text{IsPoisson}(z_{a_i})$  **returns**  $z_{a_i} = K$ .}

**for**  $a \leftarrow 0$  **to**  $K - 1$  **do**

$\mathcal{Z}_a \leftarrow \{\}$

**for**  $i \leftarrow 0$  **to**  $|\mathcal{P}_a| - 1$  **do**

$z_{a_i} \leftarrow \text{UniformInt}(0, K + 1)$      $\{z_{a_i} \in [0, K]\}$

**end for**

$\mathcal{Z}_a \leftarrow \mathcal{Z}_a \cup \{z_{a_i}\}$

**end for**

{Sample hidden labels}

**for**  $iter \leftarrow 0$  **to**  $I - 1$  **do**

**for**  $a \leftarrow 0$  **to**  $K - 1$  **do**

$EStep(\mathcal{P}_a, \mathcal{Z}, \alpha_p, \mu[a], K)$

$\mu[a] \leftarrow MStep(\mathcal{P}_a, \mathcal{Z}_a)$

**end for**

**end for**

$G \leftarrow \text{Zeros}(K, K)$

{Compute Output.  $G[b, a] = \frac{n_{ba} + \alpha_p}{n_b + \alpha_p K}$ }

**return**  $G, \mu$

---

---

**Algorithm 3** Expectation Step ( $EStep$ )

---

**Input:** observations  $\mathcal{P}_a$ , current state  $\mathcal{Z}$ , prior  $\alpha_p$ , num. proc.  $K$ , exogeneous rate  $\mu_a$

{The tree is populated with the probability that each process  $\mathcal{P}_b$  can cause  $t_{a_i}$ . i.e.,  $t[b] = \frac{n_{ba} + \alpha_p}{n_b + \alpha_p K}$ }

$t \leftarrow FPTreeBuild(\mathcal{Z})$

**for**  $i \leftarrow 0$  **to**  $|\mathcal{P}_a| - 1$  **do**

**if not**  $\text{IsPoisson}(z_{a_i})$  **then**

$b \leftarrow z_{a_i}$

$t[b] \leftarrow \frac{n_{ba} + \alpha_p - 1}{n_b + \alpha_p K - 1}$

**end if**

**if not**  $\text{Uniform}(0, 1) < e^{-\mu_a(t_{a_i} - t_{\mu_a})}$  **then**

$z_{a_i} \leftarrow K$

**else**

$c \leftarrow z_{a_i}$

$b \leftarrow FPTreeSample(t)$

        {See Eq (6) for the proposal  $Q$  and target  $P$ }

**if**  $\text{Uniform}(0, 1) < \min\{1, (P(c)Q(b))/(P(b)(c))\}$  **then**

$z_{a_i} \leftarrow b$

**end if**

$t[b] \leftarrow \frac{n_{ba} + \alpha_p + 1}{n_b + \alpha_p K + 1}$

**end if**

**end for**

---
